# Supplementary material for: Ionic liquid-assisted perovskite crystal film growth for high performance planar heterojunction perovskite solar cells
Source: Royal Society of Chemistry journal article supplement (doi:10.1039/c6ra24616h), 2016-01-01
Supplement: c6ra24616h1.pdf [file c6ra24616h1.pdf]

Supporting Information for

**Ionic liquid-assisted perovskite crystal film growth for high performance planar heterojunction perovskite solar cells**

Yangyang Wan <sup>a,b</sup>, Sujuan Dong <sup>a,b</sup>, Yaling Wang <sup>a,b</sup>, Liying Yang <sup>\*a,b</sup>, Wenjing Qin <sup>a,b</sup>, Huanqi Cao <sup>a,b</sup>, Cong Yao <sup>\*c</sup>, Ziyi Ge<sup>\*d</sup>, Shougen Yin <sup>\*a,b</sup>

a Key Laboratory of Display Materials and Photoelectric Devices, Education Ministry of China, School of Materials Science and Engineering, Tianjin University of Technology, Tianjin 300384, China

b Tianjin Key Laboratory for Photoelectric Materials and Devices, Tianjin University of Technology, Tianjin 300384, China

c China Electronics Technology Group Corporation No.18th Research Institute, Tianjin 300384, China

d Ningbo Institute of Materials Technology & Engineering, Chinese Academy of Sciences, Ningbo 315201, China

**Keywords:** Perovskite solar cells; Additive; Ionic liquid; one-step deposited; Trap states

Correspondence authors email: [liyingyang@tjut.edu.cn](mailto:liyingyang@tjut.edu.cn); [sgyin@tjut.edu.cn](mailto:sgyin@tjut.edu.cn); [geziyi@nimte.ac.cn](mailto:geziyi@nimte.ac.cn) and [huobingyao@vip.qq.com](mailto:huobingyao@vip.qq.com).

## **Experimental**

### **Materials**

An aqueous dispersion of PEDOT: PSS (Baytron<sup>®</sup> PVP Al 4083) was obtained from Heraeus Co. 1-ethylpyridinium chloride (1-EC) was purchased from ACROS. Fullerene derivative (PCBM) with purity over 99% was obtained from Solenne B.V., Netherlands. N, N-dimethylformamide (DMF, purity 99.5%) obtained from J&K Scientific.  $\text{PbAc}_2 \cdot 3\text{H}_2\text{O}$  (99.995%, metals basis, Alfa Aesar).  $\text{PbAc}_2$  was dehydrated in vacuum drying oven at 75°C for 1 h prior to use.  $\text{CH}_3\text{NH}_3\text{I}$  was synthesized using the same method as published in literature. ITO-coated glass with a sheet resistance of 10  $\Omega$ / square is used for device fabrication. The routine cleaning procedure includes ultra-sonication in a solution of detergent, deionized water in sequence.

### **Preparation of the perovskite precursor**

$\text{CH}_3\text{NH}_3\text{PbI}_3$  precursor solution with a concentration of 0.5 M was prepared by mixing lead salts ( $\text{PbAc}_2$ ) and  $\text{CH}_3\text{NH}_3\text{I}$  in DMF. The mole ratio of  $\text{PbAc}_2$ :  $\text{CH}_3\text{NH}_3\text{I}$  mixture was 1:3 according to the literature. Different content in quality of 1-EC additive (0 wt%, 0.25 wt%, 0.5 wt%, 0.75 wt%, 1 wt%, 1.25 wt%) was added to this precursor solution.

### **Device fabrication and performance measurements**

The preparation of the solar cell is described as follows. The washed ITO coated glasses were dried under an infrared lamp for 15min. The substrate was then treated with UV-ozone for 15 min. The PEDOT: PSS layer of about 40 nm was fabricated by spin coating at 3000 rpm for 30 s on ITO-coated glass substrates, followed by baking at 120°C for 30 minutes in air. The precursor

solutions were spin-coated on top of the PEDOT: PSS layer at 2000 rpm for 40 s. The perovskite-coated films were then annealed on a hot-plate at 90°C for 10 min. The measured thickness of the perovskite film was about 180 nm. The humidity is 19%. For the electron transport materials, 24 mg/mL PCBM dissolved in o-dichlorobenzene solution was then sequentially casted onto the CH<sub>3</sub>NH<sub>3</sub>PbI<sub>3</sub> film by spin coating at 1000 rpm for 60 s in ambient condition and then dried in air on a 100 °C hot-plate for 10 minutes. Finally, 150 nm Al are thermally evaporated under a vacuum with a pressure of 1×10<sup>-4</sup> Pa to form planar device structure. The characterization procedures were performed in an ambient atmosphere at room temperature. The active area of each device was about 0.075 cm<sup>2</sup> defined by a shadow mask. The J-V characteristics of the un-encapsulated devices were measured under intensity of 100 mW/cm<sup>2</sup> illuminations by using a 150W solar simulator with an AM1.5 G filter. The light intensity was calibrated with an Oriel mono-Si reference cell (CROWNTECH PVM 272 certificated by NREL). The surface roughness and morphology of the CH<sub>3</sub>NH<sub>3</sub>PbI<sub>3</sub> layers were characterized by Bruker INNOVA<sup>®</sup> SPM in tapping mode. The thickness of above layer was measured by a surface profiler (KLA Tencor<sup>®</sup> Alpha Step D-100). More detailed information on device fabrication and device characterization can be found in our previous paper.

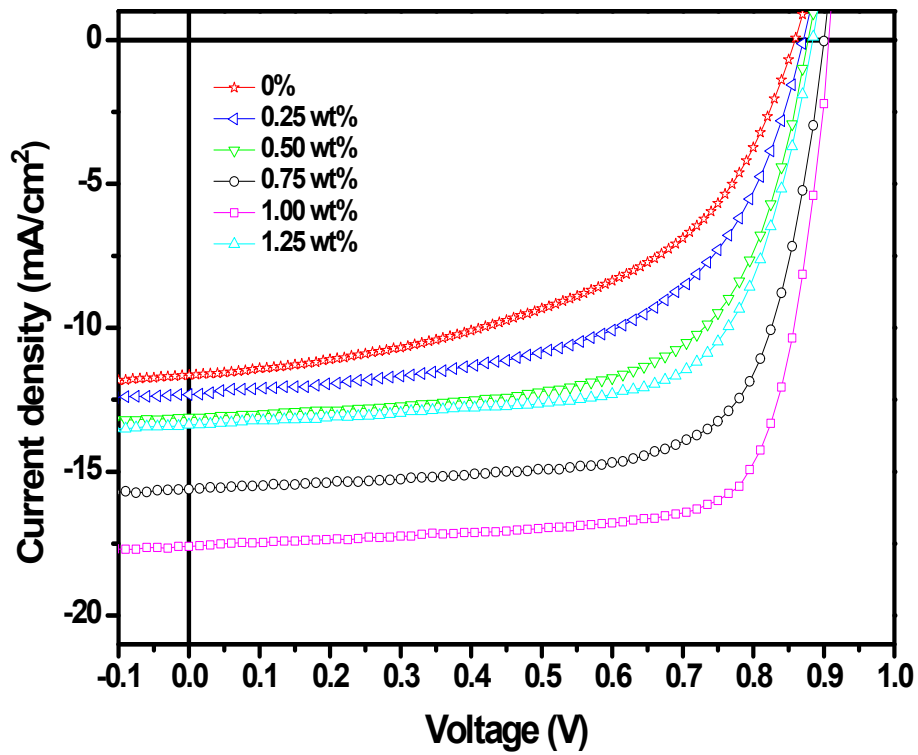

**Fig.S1** The J-V characteristics for perovskite solar cells with different concentration of 1-EC additive.

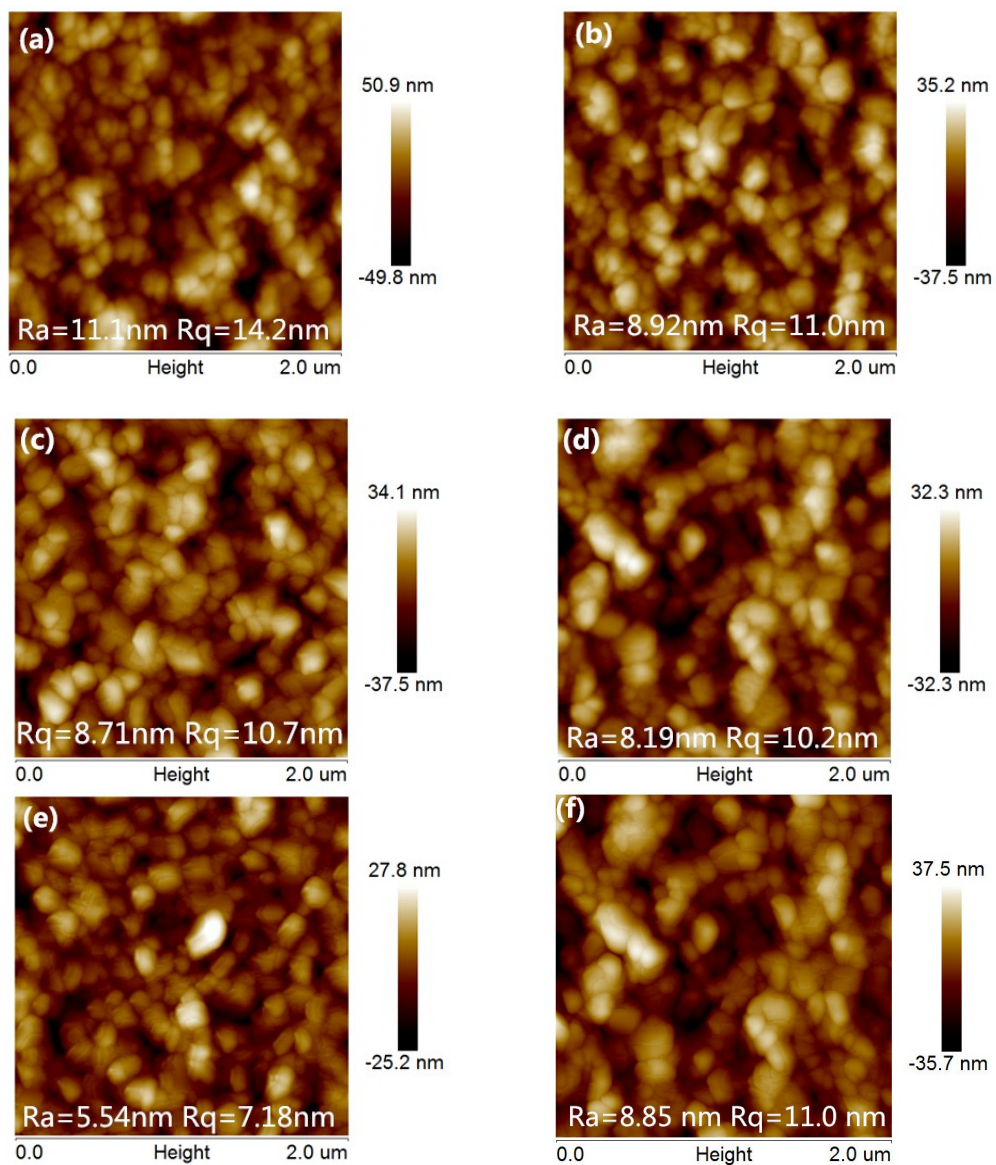

**Fig. S2** The AFM topography of the surface morphology of pristine  $\text{CH}_3\text{NH}_3\text{PbI}_3$  (a) and with different content of 1-EC as additive. (b: 0.25wt%; c: 0.5wt%; d: 0.75wt%; e: 1wt%; f: 1.25wt%).

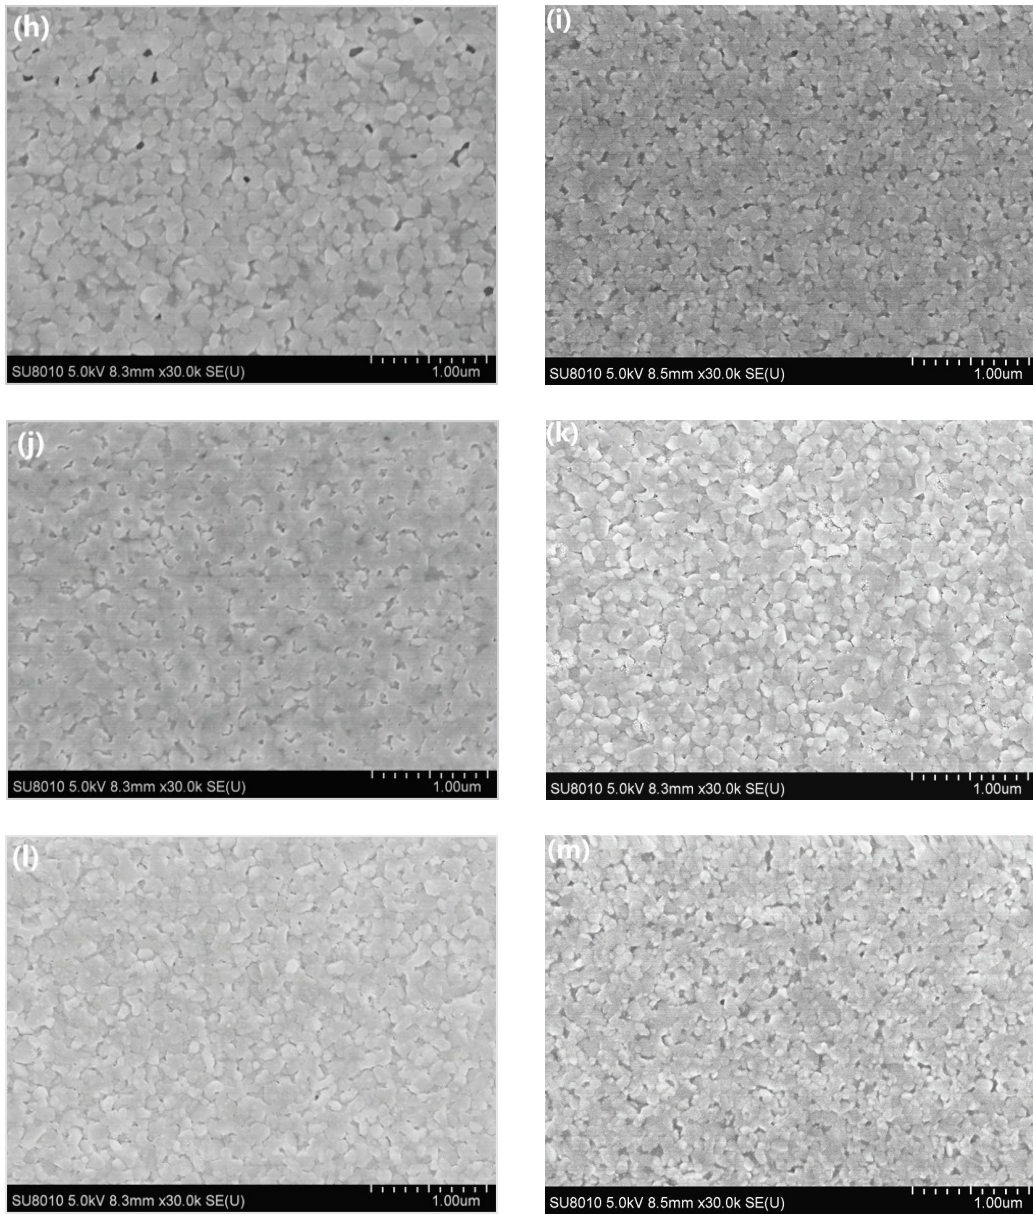

**Fig. S3** The SEM images of perovskite film with different content of 1-EC (h-pristine; i-0.25wt%; j-0.5wt%; k-0.75wt%; l-1wt%; m-1.25wt%).

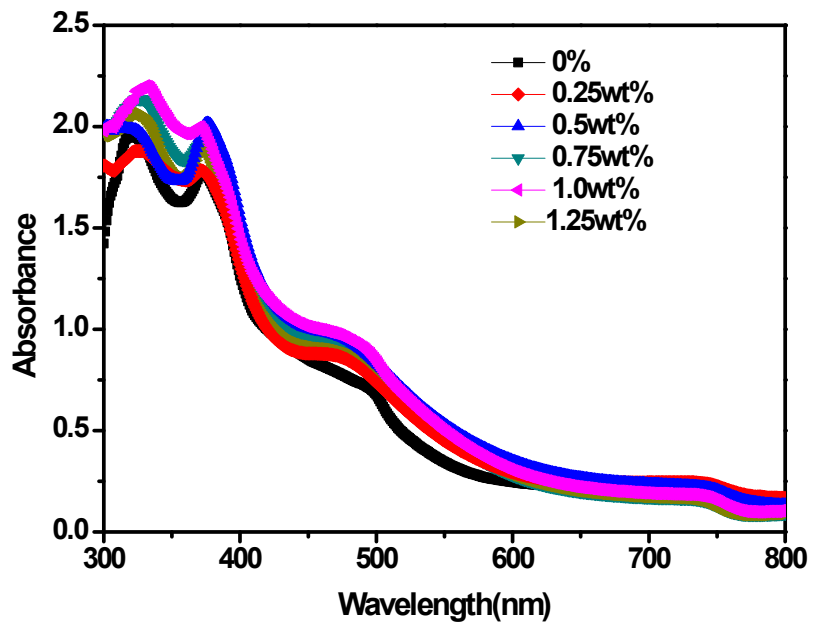

**Fig. S4** The UV-Vis absorption for pristine CH<sub>3</sub>NH<sub>3</sub>PbI<sub>3</sub> film and with different content of 1-EC as additive.

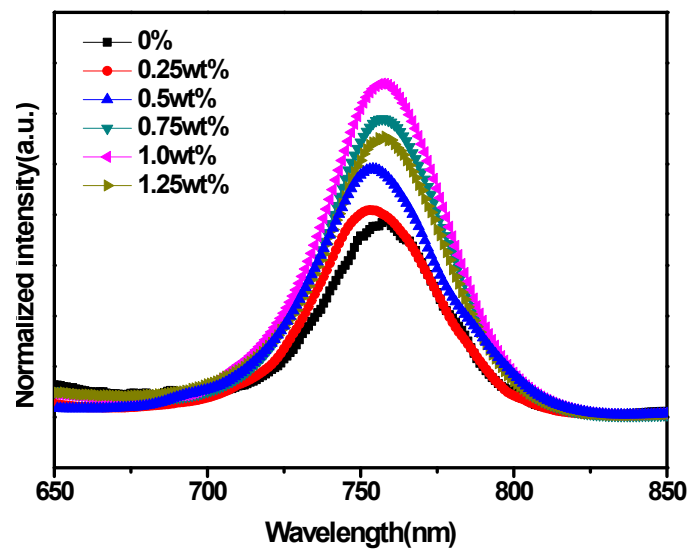

**Fig. S5** The steady-state PL spectra (b) for pristine  $\text{CH}_3\text{NH}_3\text{PbI}_3$  film and with different content of 1-EC as additive.



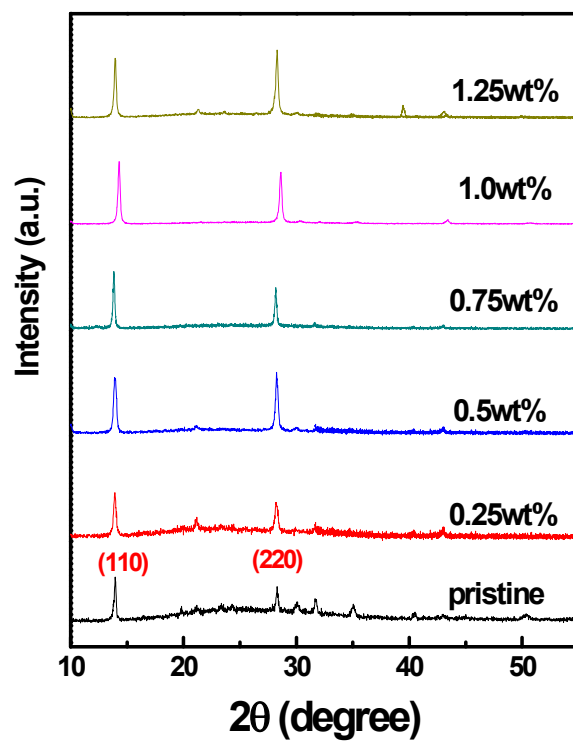

**Fig. S6** The XRD patterns of  $\text{CH}_3\text{NH}_3\text{PbI}_3$  films formed on PEDOT: PSS with different concentration of 1-EC additive.

**Table S1** Peak parameters of the average crystallite sizes in pristine CH<sub>3</sub>NH<sub>3</sub>PbI<sub>3</sub> film and the films formed with 1.0wt% 1-EC as additive estimated from the Scherrer formula.

| Parameters                                     | Perovskite films           |                  |
|------------------------------------------------|----------------------------|------------------|
|                                                | With 1.0 wt% 1-EC additive | Without additive |
| FWHM ( $\beta$ )                               | 0.20                       | 0.28             |
| Bragg angle ( $\theta$ ) primary peak (degree) | 7.13                       | 7.01             |
| X-ray wavelength ( $\lambda$ )                 | 0.154                      | 0.154            |
| Constant (K)                                   | 0.9                        | 0.9              |
| D <sub>XRD</sub> (nm)                          | 40.03                      | 28.59            |
